# Supplementary material for: DEER distance measurements on trityl/trityl and Gd(iii)/trityl labelled proteins
Source: Royal Society of Chemistry journal article supplement (doi:10.1039/c8cp07249c), 2019-01-01
Supplement: c8cp07249c1.pdf [file c8cp07249c1.pdf]

## Supporting Information

### DEER distance measurements on trityl/trityl and Gd(III)/trityl labelled proteins

Angeliki Giannoulis,<sup>†1</sup> Yin Yang,<sup>†1</sup> Yan-Jun Gong,<sup>‡2</sup> Xiaoli Tan,<sup>‡3</sup> Akiva Feintuch,<sup>1</sup> Raanan Carmieli,<sup>4</sup> Thorsten Bahrenberg,<sup>1</sup> Yangping Liu,<sup>3\*</sup> Xun-Cheng Su,<sup>2\*</sup> Daniella Goldfarb<sup>1\*</sup>

<sup>1</sup> Department of Chemical and Biological Physics, Weizmann Institute of Science, Rehovot 76100, Israel

<sup>2</sup> State Key Laboratory of Elemento-organic Chemistry, Collaborative Innovation Center of Chemical Science and Engineering, Nankai University, Tianjin 300071, China

<sup>3</sup> Tianjin Key Laboratory on Technologies Enabling Development of Clinical Therapeutics and Diagnostics, School of Pharmacy, Tianjin Medical University, Tianjin 300070, China

<sup>4</sup> Department of Chemical Research Support, Weizmann Institute of Science, Rehovot 76100, Israel

<sup>†</sup> The first four authors contributed equally

#### Contents

|                                                                     |     |
|---------------------------------------------------------------------|-----|
| 1. Characterization of CT02MA .....                                 | S2  |
| 2. Estimation of labelling efficiency.....                          | S3  |
| 3. PD-EPR sequences and conditions .....                            | S6  |
| 4. Additional EPR data on GB1-CT02MA .....                          | S8  |
| 5. Additional EPR data on ubiquitin-CT02MA.....                     | S13 |
| 6. Additional EPR data on ubiquitin-CT02MA/BrPy-DO3MA-Gd(III) ..... | S16 |

## 1. Characterization of CT02MA

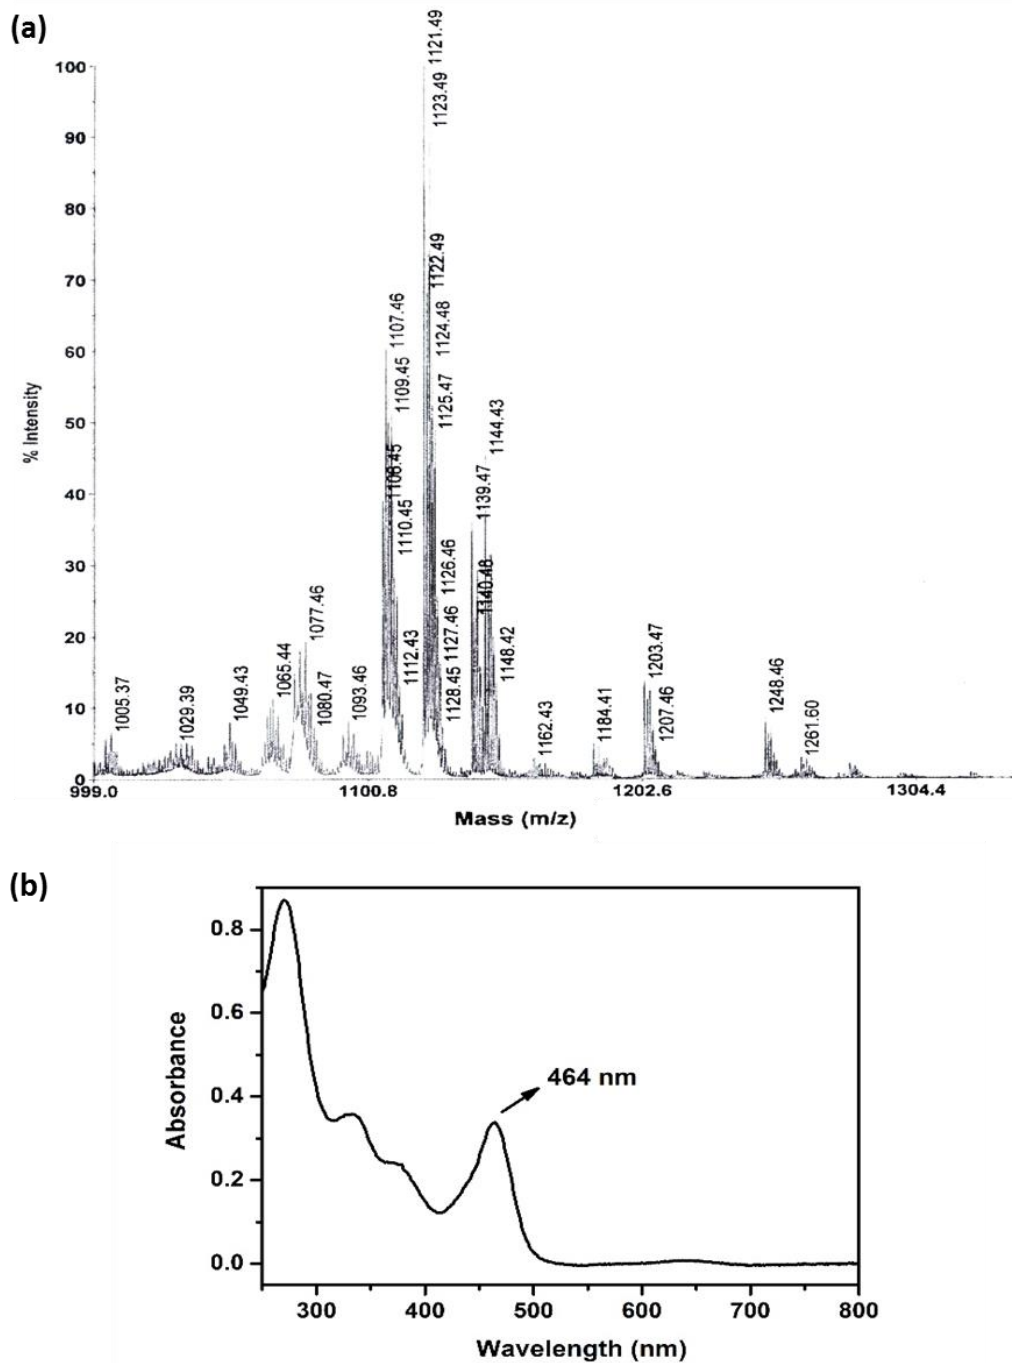

**Figure S1.** (a) MALDI-TOF spectrum in DHB matrix. The spectrum was acquired on a ABSciex TOF/TOF 5800 system (Applied biosystems intl., inc, CA, USA) equipped with a 355 nm laser and the spectrum was obtained in reflector positive mode with parameters: detector voltage 12.0 kV, ion source 1.59 kV, lens 1 4.0 kV and the laser pulse was set to 200 Hz. (b) UV-Vis spectrum of 20  $\mu\text{M}$  CT02MA in PBS buffer (20 mM, pH 7.4).

## 2. Estimation of labelling efficiency

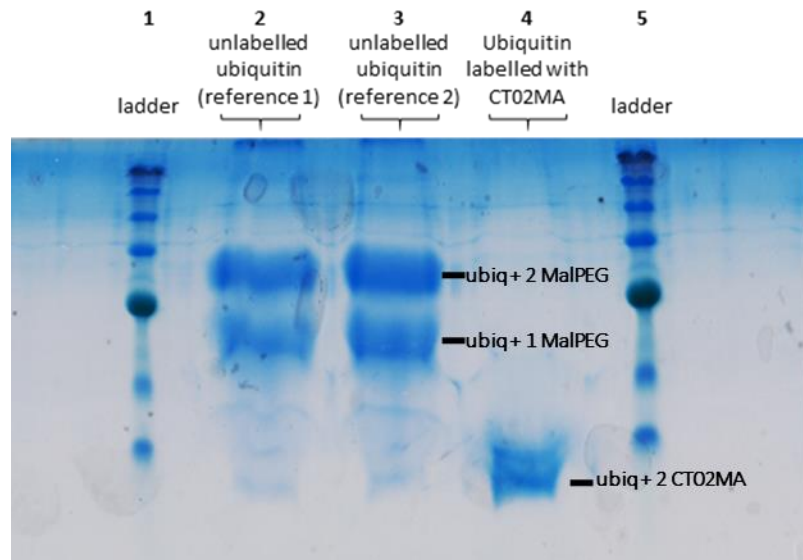

**Figure S2.** SDS-page of ubiquitin after binding to MalPEG for testing labelling efficiency. Conditions: 18% acrylamide gel, 200 V. As reference we used unlabelled ubiquitin and observed the appearance of the mono- and doubly labelled MalPEG-labelled ubiquitin (lanes 2 and 3).

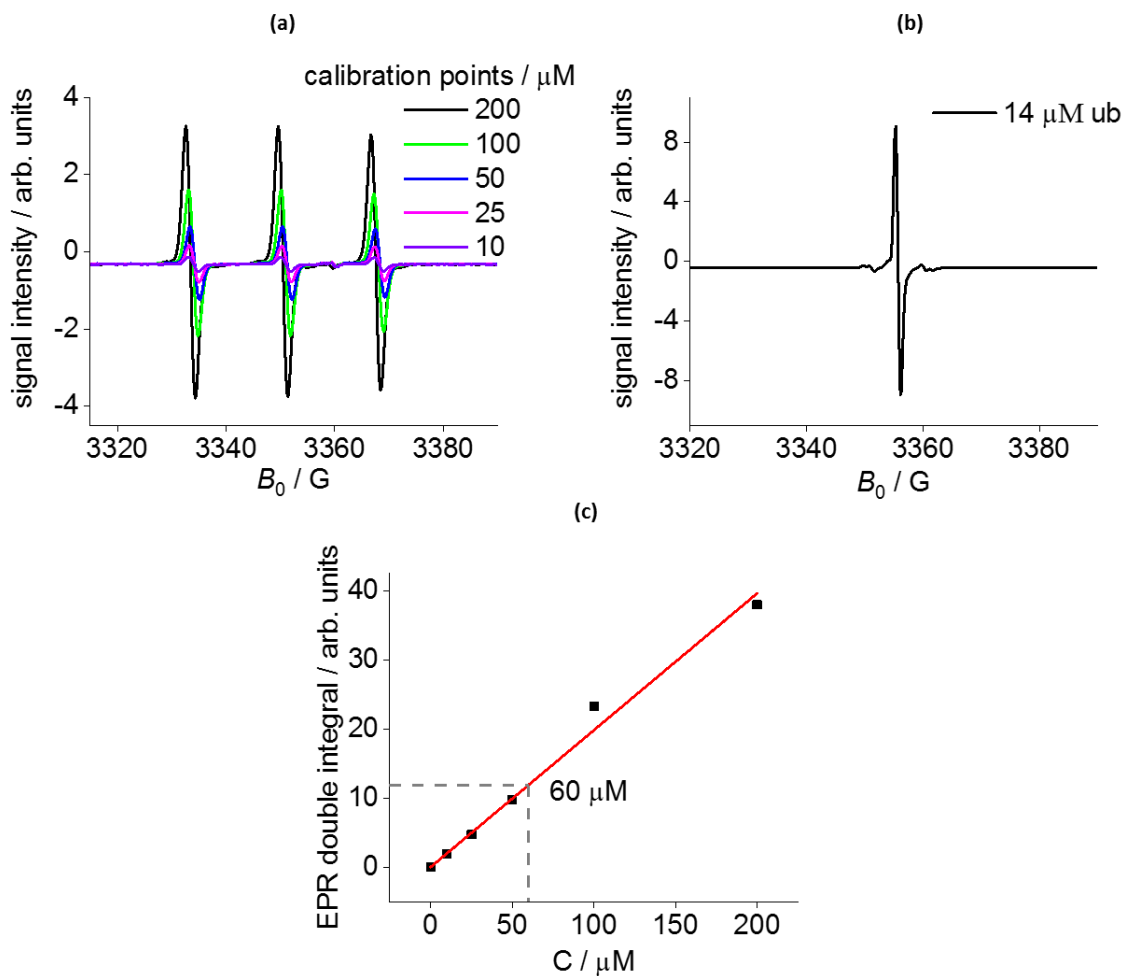

**Figure S3.** CW-EPR spectrum of (a) different MTSL concentrations (200, 100, 50, 25 and 10  $\mu\text{M}$ ) used for the calibration curve and of (b) ubiquitin-trityl. (c) Plot of the double integral of the EPR spectra of the calibration points. The double integral value of the trityl-labelled ubiquitin (unknown spin concentration, 14  $\mu\text{M}$  labelled ubiquitin as estimated from Western blot, see Figure S4) yielded 60  $\mu\text{M}$  spin concentration and is shown in dashed grey lines. Parameters: 9.419 GHz, 34 dB attenuation, 16 scans, 1.0 G modulation amplitude.

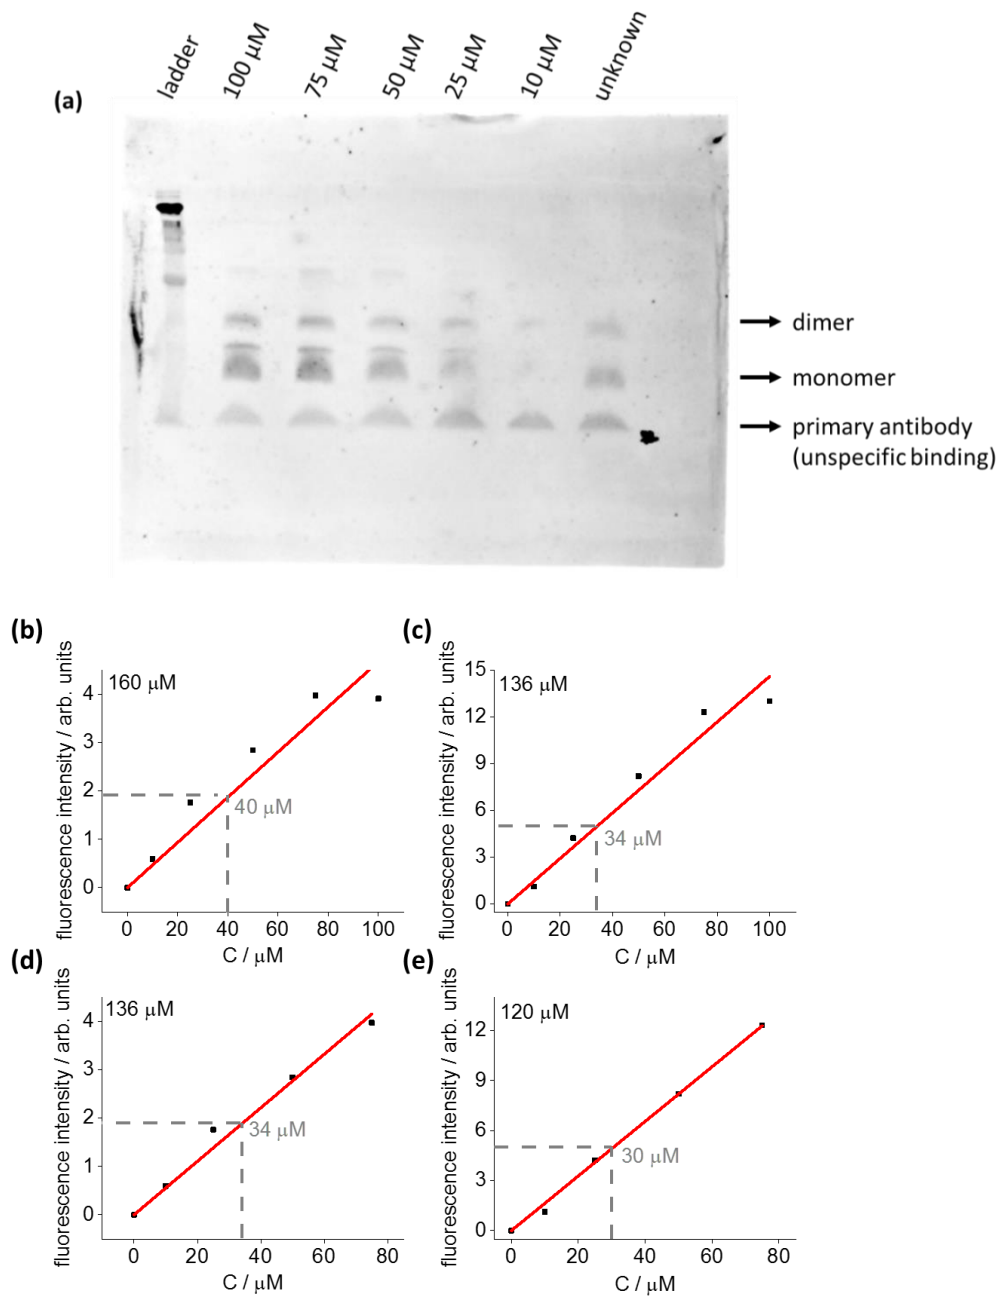

**Figure S4.** (a) Western blot of ubiquitin with the calibration points (100, 75, 50, 25 and 10 μM) and the unknown sample (4 × diluted CT02MA-labelled ubiquitin) and plot of fluorescence intensity vs concentration for dimer (b, d) and monomer (c, e) bands using all data points (b, c) and excluding the 100 μM data point (d, e). From these plots and from the intensity of the unknown sample we estimated the concentration of the diluted unknown (values given in grey) which we then multiplied by four (values given in black). Given that monomer and dimer bands showed good agreement in their fluorescence signals we took their mean value for quantifying the concentration of ubiquitin which was found to be 138 μM.

### 3. PD-EPR sequences and conditions

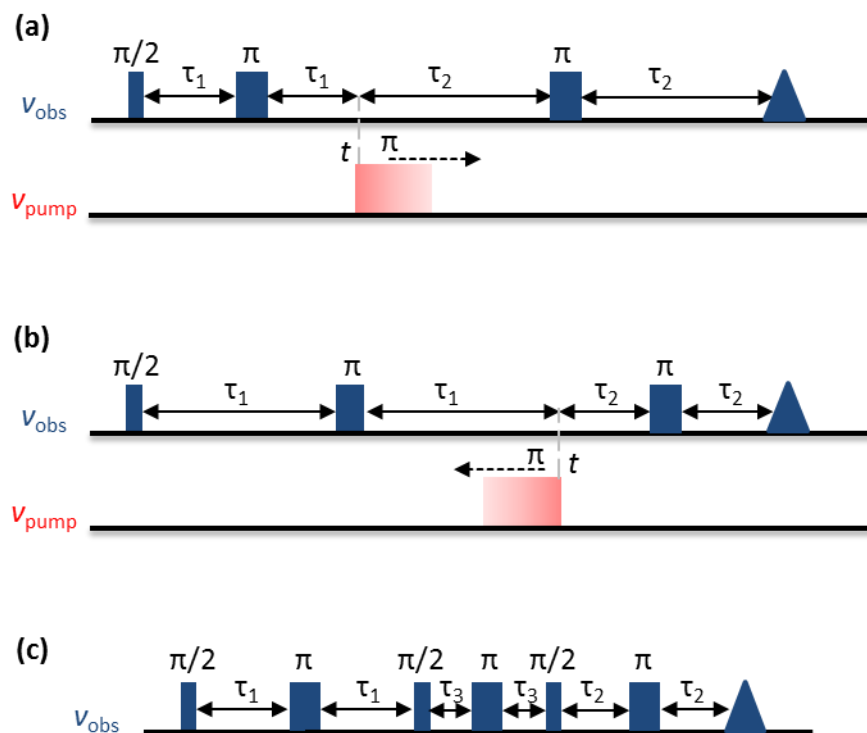

Figure S5. (a) Standard, (b) 'reversed' DEER<sup>1-3</sup> and (c) DQC<sup>4</sup> sequences for measuring spin-spin distances.

Table S1. Parameters of the DEER measurements on GB1-trityl.

| protein                                                          | GB1               |                   |                   |                    |                       |                       |                                            |
|------------------------------------------------------------------|-------------------|-------------------|-------------------|--------------------|-----------------------|-----------------------|--------------------------------------------|
| label                                                            | CTO2MA            |                   |                   |                    |                       |                       |                                            |
| experiment                                                       | 'reversed' DEER   |                   |                   |                    |                       |                       |                                            |
| set-up                                                           | 1                 | 2                 | 3                 | 4                  | 5                     | 6                     | 7                                          |
| $\pi/2$ - $\pi$ pulse length / ns<br>( $\nu_{\text{obs}}$ / GHz) | 50-100<br>(94.91) | 50-100<br>(94.91) | 50-100<br>(94.91) | 50-100<br>(94.885) | 50-100<br>(94.91)     | 50-100<br>(94.89)     | 50-100<br>(94.90)                          |
| pump pulse length / ns<br>( $\nu_{\text{pump}}$ / GHz)           | 50<br>(94.89)     | 30<br>(94.88)     | 30<br>(94.885)    | 30<br>(94.91)      | 128<br>(94.86-94.89)* | 128<br>(94.91-94.94)* | 128, 128<br>(94.86-94.88,<br>94.92-94.94)* |
| $\tau_1$ / $\mu$ s                                               | 5.2               | 5.2               | 5.2               | 5.2                | 5.2                   | 5.2                   | 5.2                                        |
| $\tau_2$ / $\mu$ s                                               | 3                 | 3                 | 3                 | 3                  | 3                     | 3                     | 3                                          |
| starting $t$ / ns                                                | -200              | -200              | -200              | -200               | -200                  | -200                  | -200                                       |
| $\Delta t$ / ns                                                  | 25                | 25                | 25                | 25                 | 25                    | 25                    | 25                                         |
| repetition time / ms                                             | 10                | 10                | 10                | 10                 | 10                    | 10                    | 10                                         |
| SNR / min <sup>-1</sup>                                          | 0.094             | 0.059             | 0.111             | 0.055              | 0.079                 | 0.075                 | 0.055                                      |

\*in all Tables it refers to chirp pulses covering the stated range of frequencies.

**Table S2.** Parameters of the DQC measurements on GB1-trityl and ubiquitin-trityl.

| protein                                                      | GB1             | ubiquitin       |
|--------------------------------------------------------------|-----------------|-----------------|
| label                                                        | CT02MA          | CT02MA          |
| experiment                                                   | DQC             | DQC             |
| $\pi/2-\pi$ pulse length / ns<br>( $\nu_{\text{obs}}$ / GHz) | 10-20<br>(9.80) | 10-20<br>(9.80) |
| $\tau_1$ / $\mu\text{s}$                                     | 2.1             | 1.6             |
| $\tau_2$ / $\mu\text{s}$                                     | 2.4             | 1.9             |
| $\tau_3$ / ns                                                | 30              | 30              |
| starting $t$ / ns                                            | -300            | -300            |
| $\Delta t$ / ns                                              | 20              | 20              |
| repetition time / ms                                         | 1               | 3               |

Deuterium modulation was suppressed by incrementing  $\tau_1$  and  $\tau_2$  three times by 108 ns and summing the obtained spectra.<sup>5</sup>

**Table S3.** Parameters of the DEER measurements on GB1-Gd(III) and ubiquitin-Gd(III).

| protein                                                      | GB1                | ubiquitin          |
|--------------------------------------------------------------|--------------------|--------------------|
| label                                                        | BrPy-DO3MA-Gd(III) | BrPy-DO3MA-Gd(III) |
| experiment                                                   | standard DEER      | standard DEER      |
| $\pi/2-\pi$ pulse length / ns<br>( $\nu_{\text{obs}}$ / GHz) | 15-30<br>(94.95)   | 15-30<br>(94.95)   |
| pump pulse length / ns<br>( $\nu_{\text{pump}}$ / GHz)       | 15<br>(94.85)      | 15<br>(94.85)      |
| $\tau_1$ / $\mu\text{s}$                                     | 0.35               | 0.35               |
| $\tau_2$ / $\mu\text{s}$                                     | 6.2                | 6.0                |
| starting $t$ / ns                                            | -200               | -200               |
| $\Delta t$ / ns                                              | 30                 | 30                 |
| repetition time / ms                                         | 0.8                | 0.8                |

**Table S4.** Parameters of the DEER measurements on ubiquitin-trityl.

| protein                                                      | ubiquitin         |                                         |
|--------------------------------------------------------------|-------------------|-----------------------------------------|
| label                                                        | CT02MA            |                                         |
| experiment                                                   | 'reversed' DEER   |                                         |
| set-up                                                       | 3                 | 7                                       |
| $\pi/2-\pi$ pulse length / ns<br>( $\nu_{\text{obs}}$ / GHz) | 50-100<br>(94.91) | 50-100<br>(94.90)                       |
| pump pulse length / ns<br>( $\nu_{\text{pump}}$ / GHz)       | 30<br>(94.885)    | 128, 128<br>(94.86-94.88, 94.92-94.94)* |
| $\tau_1$ / $\mu\text{s}$                                     | 4.5               | 4.7                                     |
| $\tau_2$ / $\mu\text{s}$                                     | 3                 | 3                                       |
| starting $t$ / ns                                            | -200              | -200                                    |
| $\Delta t$ / ns                                              | 25                | 20                                      |
| repetition time / ms                                         | 10                | 10                                      |
| SNR / $\text{min}^{-1}$                                      | 8.06E-02          | 4.87E-02                                |

**Table S5.** Parameters of the DEER measurements on ubiquitin-trityl/Gd(III).

| set-up                                                           | 1               | 2                    | 3                | 4                     | 5                    |
|------------------------------------------------------------------|-----------------|----------------------|------------------|-----------------------|----------------------|
| observe                                                          | Gd(III)         | Gd(III)              | Gd(III)          | Gd(III)               | Gd(III)              |
| pump                                                             | trityl          | trityl               | trityl           | trityl                | Gd(III)              |
| cavity                                                           | single          | single               | dual             | dual                  | single               |
| DEER set-up                                                      | standard        | 'reversed'           | standard         | 'reversed'            | 'reversed'           |
| $\pi/2$ - $\pi$ pulse length / ns<br>( $\nu_{\text{obs}}$ / GHz) | 15-30<br>(94.8) | 15-30<br>(94.76)     | 40-80<br>(94.48) | 40-80<br>(94.48)      | 15-30<br>(94.95)     |
| pump pulse length / ns<br>( $\nu_{\text{pump}}$ / GHz)           | 25<br>(94.9)    | 96<br>(94.85-94.95)* | 75<br>(95.0)     | 200<br>(94.97-95.03)* | 96<br>(94.55-94.85)* |
| $\tau_1$ / $\mu\text{s}$                                         | 0.375           | 4.0                  | 0.375            | 3.2                   | 4.2                  |
| $\tau_2$ / $\mu\text{s}$                                         | 4.0             | 3.0                  | 3.3              | 1.0                   | 3.0                  |
| starting t / ns                                                  | -210            | -200                 | -210             | -200                  | -200                 |
| $\Delta t$ / ns                                                  | 30              | 25                   | 30               | 25                    | 25                   |
| repetition time / ms                                             | 1               | 0.8                  | 0.8              | 0.8                   | 0.8                  |
| SNR / $\text{min}^{-1}$                                          | 0.038           | 0.052                | 0.088            | 0.157                 | 0.108                |

#### 4. Additional EPR data on GB1-CT02MA

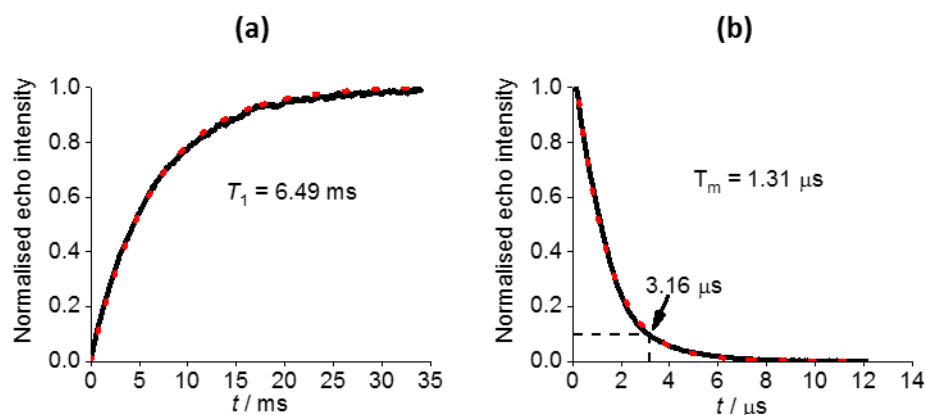

**Figure S6.** (a) Saturation recovery measurement and (b) two pulse echo decay traces of GB1-trityl. The longitudinal relaxation  $T_1$  after fitting a mono-exponential fit function (red dotted line) is given in (a) and the value at which the echo decays to 10% of its initial value and the phase memory time  $T_m$  of the trityl spins after fitting a mono-exponential decay function (red dotted line) are given on (b).



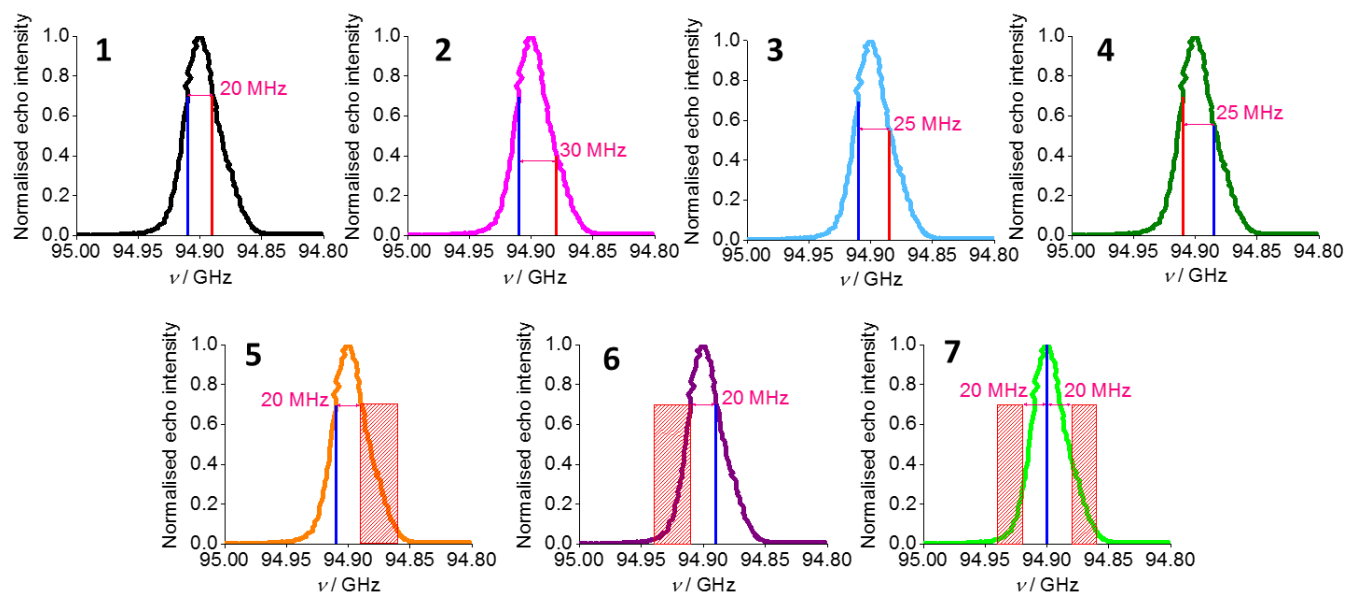

**Figure S7.** The different DEER experimental set-ups using rectangular (set-ups 1-4) and chirp (set-ups 5-7) pump pulse(s) on GB1-trityl, with the experimental set-up details given in Table S1. The red lines denote the pumped spins and the blue lines denote the observed spins.

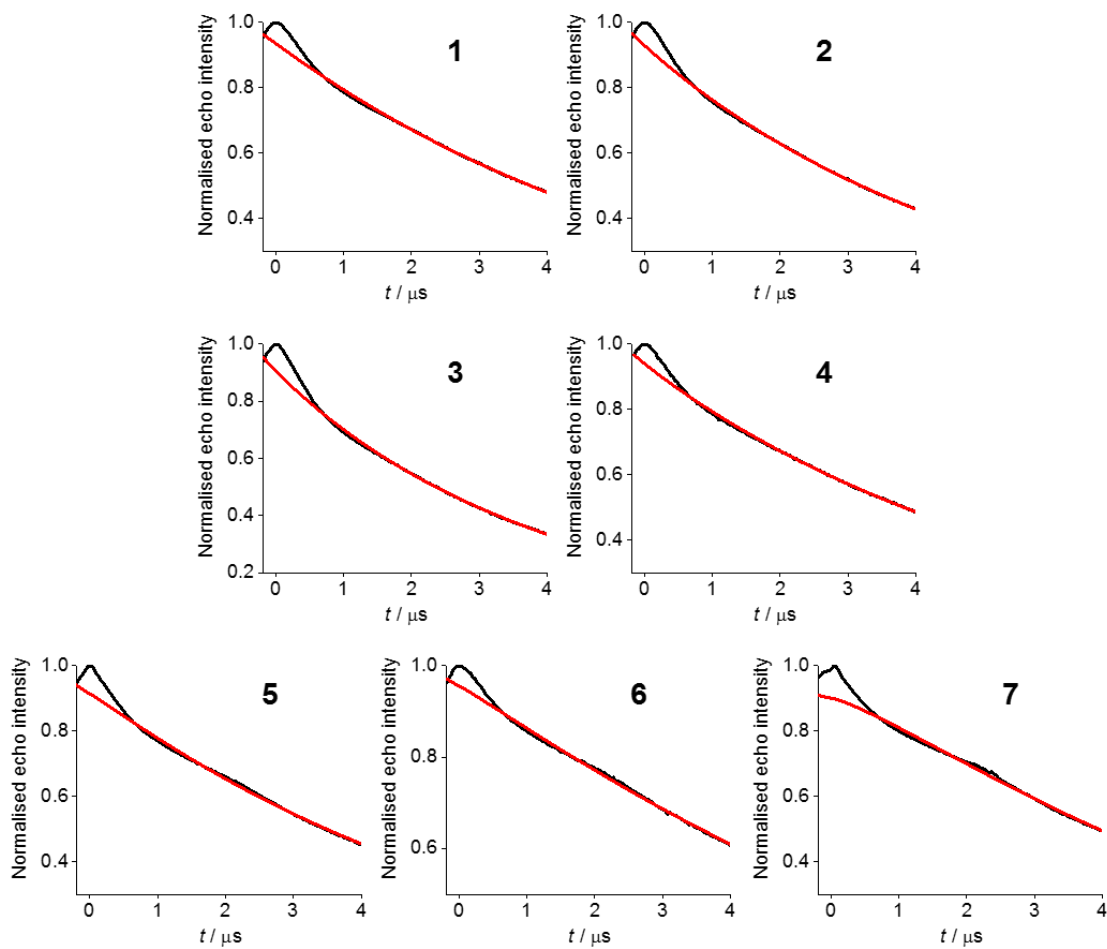

**Figure S8.** DEER primary data of GB1-trityl with experimental set-ups shown in Figure S7 and detailed in Table S1. The red line indicates the background decay function.

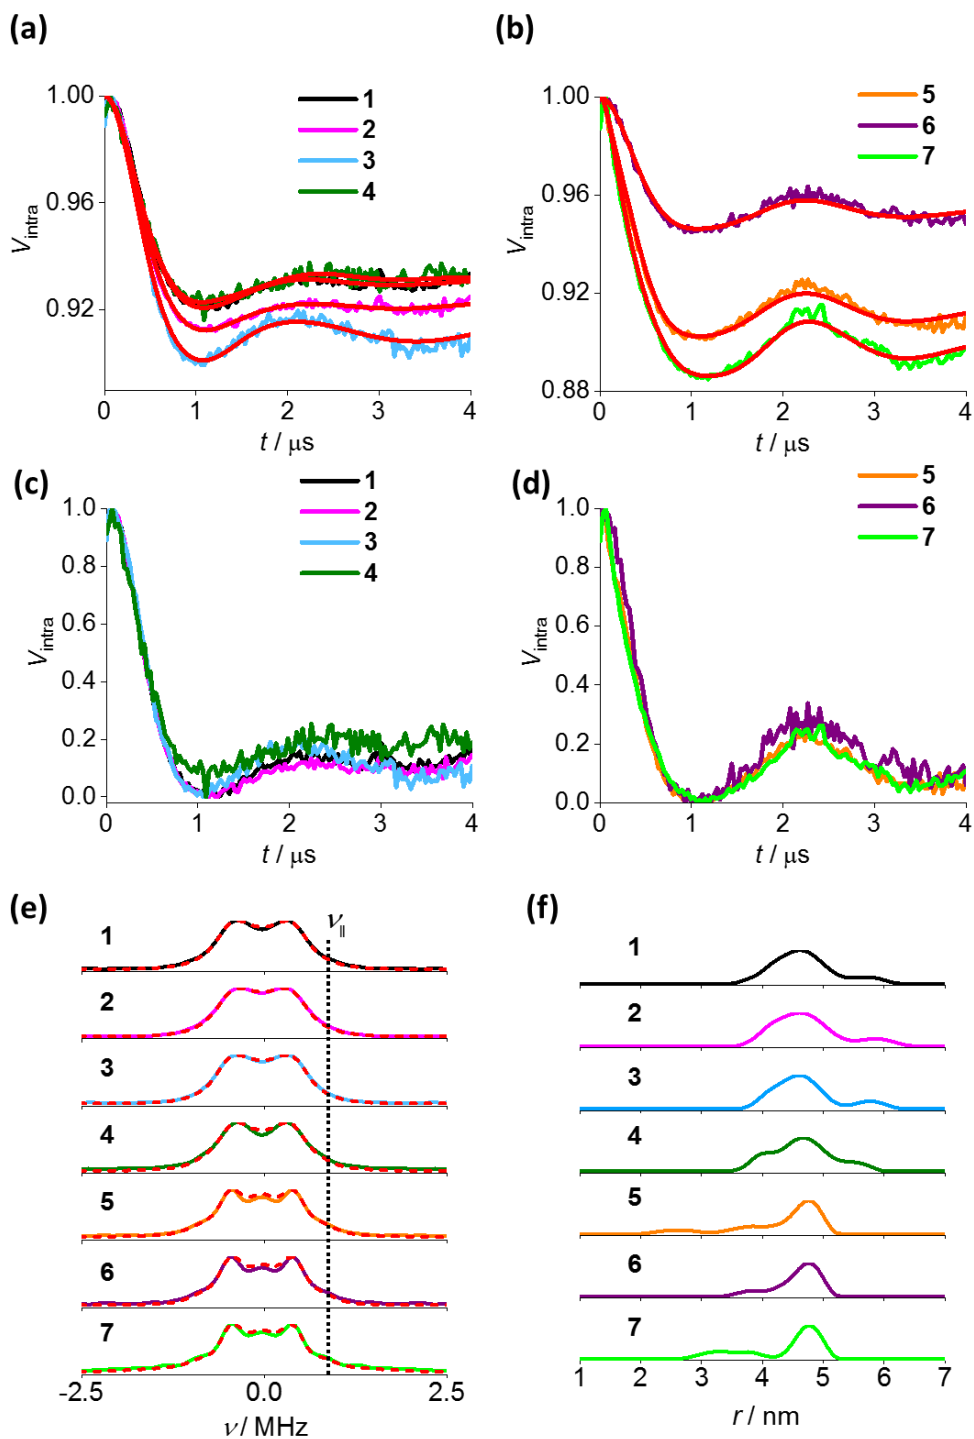

**Figure S9.** DEER results of GB1-trityl measured with set-ups given in Figure S7 and detailed in Table S1. Background corrected DEER traces with (a) rectangular and (b) chirp pump pulse(s), (c) and (d) as in (a) and (b) but the data is normalized from 0 to 1.0 and (e) respective frequency spectra and (f) distance distributions. The red solid lines in (a) and (b) and dashed lines in (c) are the fit to the data after Tikhonov regularization. The measurements were run 9.7, 9.2, 12.2, 8.7, 14.3, 8.2 and 12.8 hrs for set-ups **1** to **7**, respectively. The black dotted line denotes the frequency of the parallel component ( $\nu_{\parallel}$ ) of the Pake pattern. Primary DEER traces are given in Figure S8.

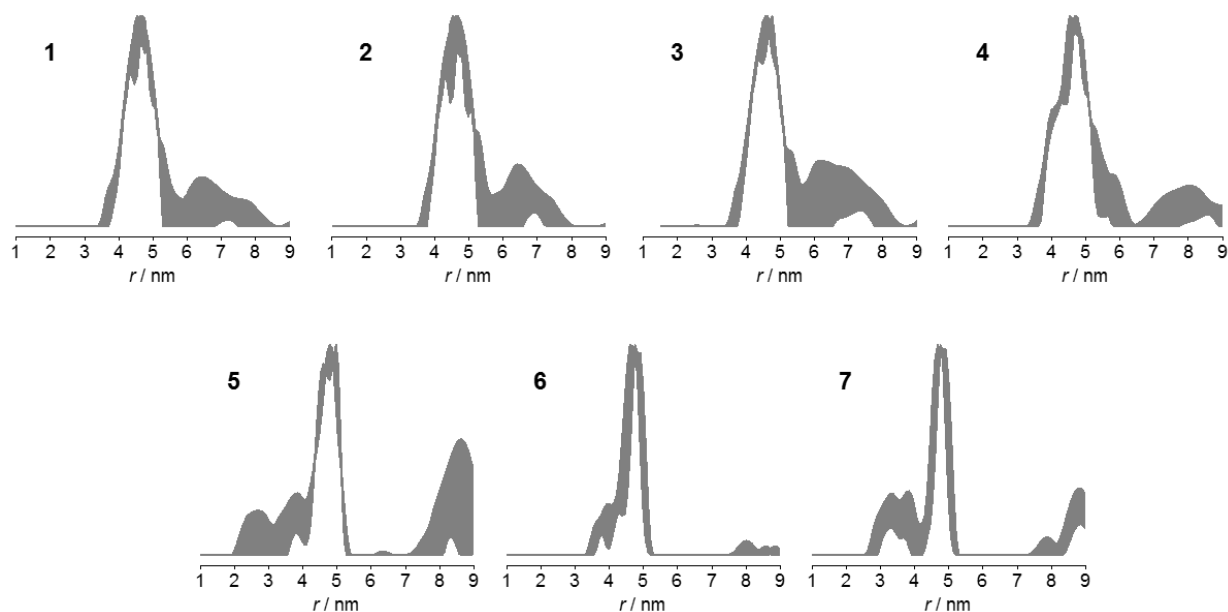

**Figure S10.** Validated distance distributions of the DEER data on the GB1-trityl with experimental set-ups given in the Figure S7 and detailed in Table S1.

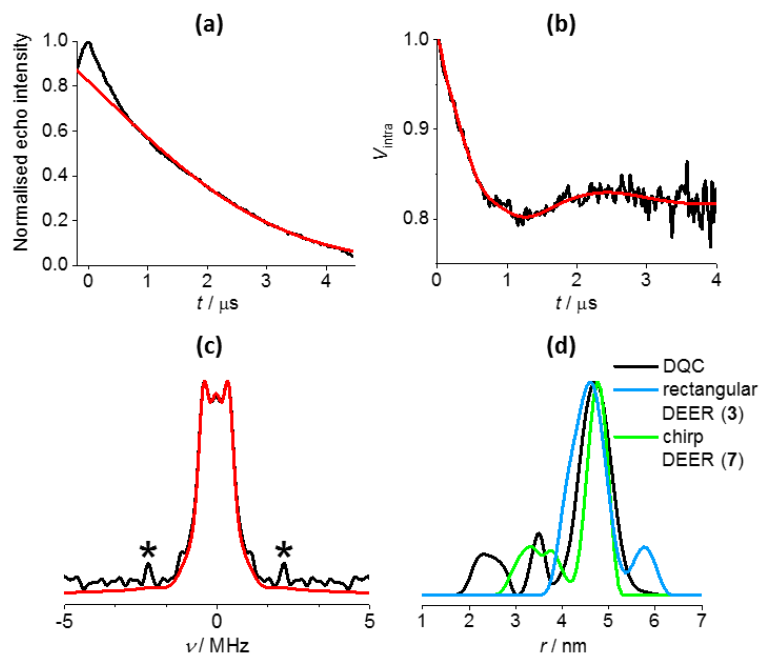

**Figure S11.** DQC results of GB1-trityl measured at 50 K at X-band. (a) Primary DQC data with the red line indicating the background decay function, (b) background-corrected DQC data with the red line indicating the fit to the data, (c) frequency spectrum with the red line indicating the fit to the data (\* corresponds the signals due to  $^2\text{H}$  modulation) and (d) distance distribution and comparison with the DEER distance distributions (set-up in parenthesis). The measurement was run 48 hrs (12 hrs for each set of  $\tau_1$  and  $\tau_2$  values).

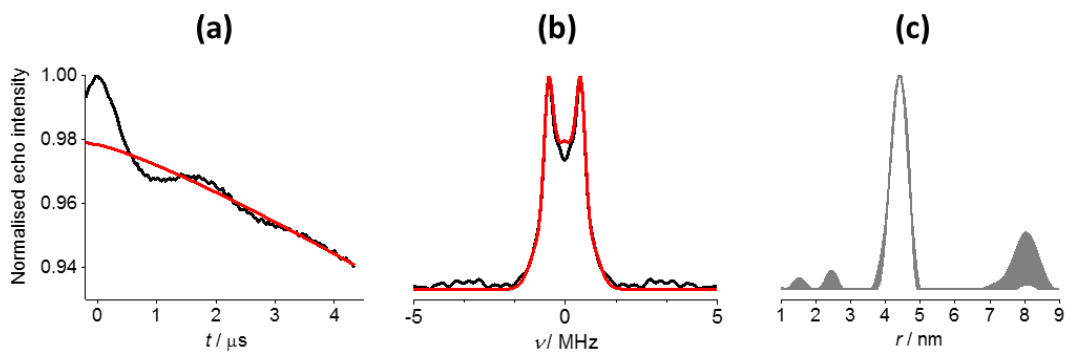

**Figure S12.** GB1-Gd(III) with rectangular DEER. (a) Primary DEER data with the red line indicating the background decay function, (b) frequency spectrum with the red line indicating the fit to the data and (c) validated distance distribution. The measurement was run 12.3 hrs.

## 5. Additional EPR data on ubiquitin-CT02MA

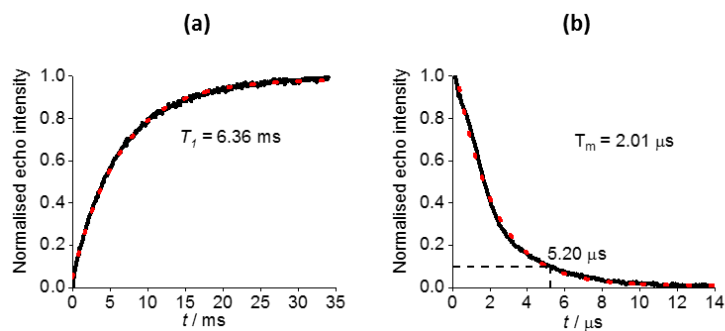

**Figure S13.** (a) Saturation recovery measurement and (b) two pulse echo decay traces of ubiquitin-trityl. The longitudinal relaxation  $T_1$  after fitting a mono-exponential fit function (red dotted line) is given in (a) and the value at which the echo decays to 10% of its initial value and the  $T_m$  of the trityl spins after fitting a mono-exponential decay function (red dotted line) are given on (b).

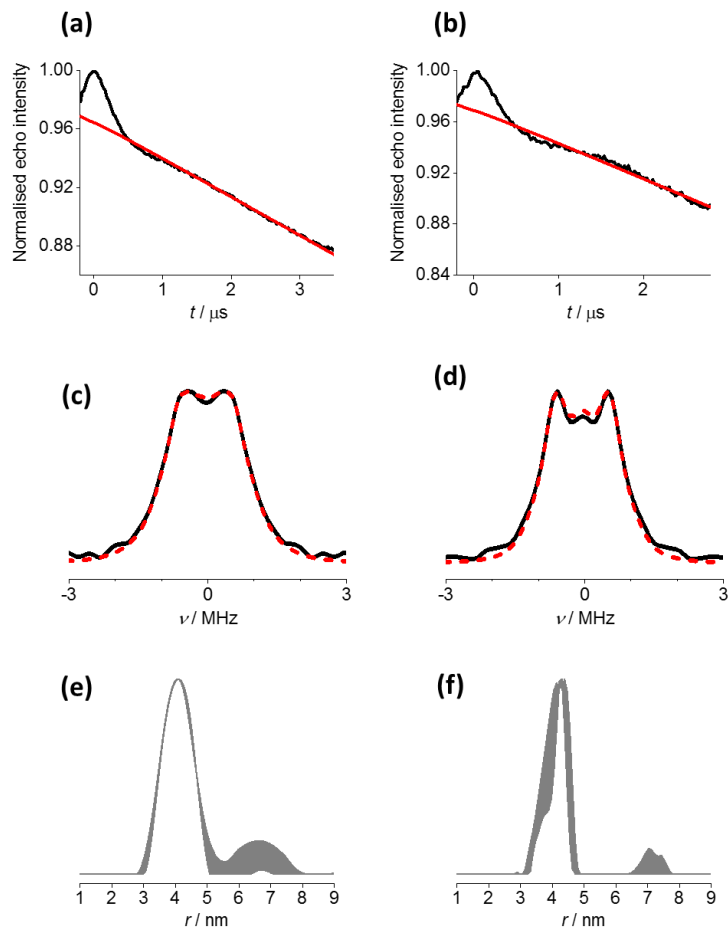

**Figure S14.** Ubiquitin-trityl measured with rectangular (a, c, e) and chirp (b, d, f) DEER. (a, b) Primary DEER data with the red solid line indicating the background decay function, (c, d) frequency spectra with the red dotted line indicating the fit to the data and (e, f) validated distance distributions. The measurements were run 11.5 and 9.8 hrs for rectangular and chirp DEER, respectively.

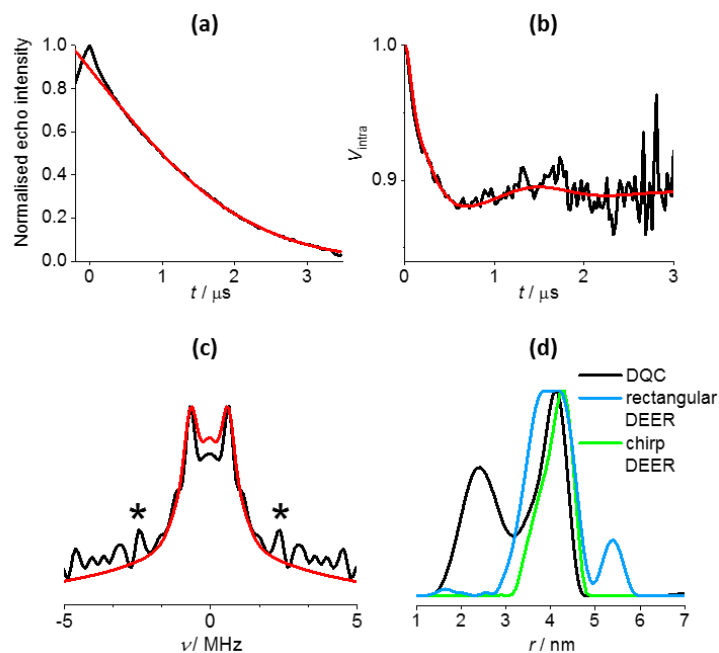

**Figure S15.** DQC results of ubiquitin-trityl measured at 50 K at X-band. (a) Primary DQC data with the red line indicating the background decay function, (b) background-corrected DQC data with the red line indicating the fit to the data, (c) frequency spectrum with the red line indicating the fit to the data data (\* corresponds the signals due to  $^2\text{H}$  modulation) and (d) distance distribution and comparison with the DEER distance distributions (set-up in parenthesis). The measurement was run 48 hrs (12 hrs for each set of  $\tau_1$  and  $\tau_2$  values).

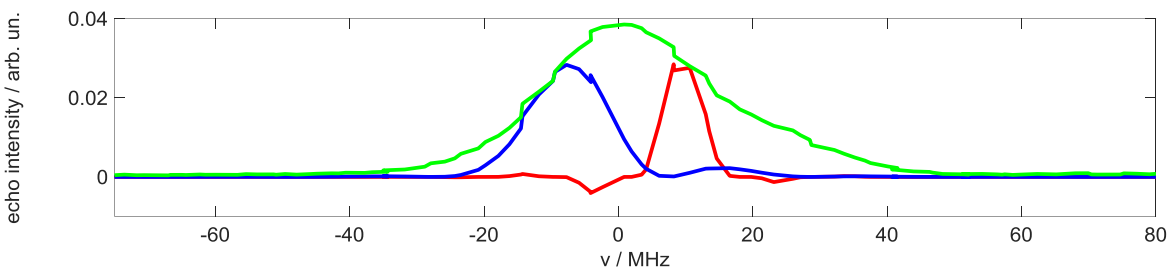

**Figure S16.** Ubiquitin-trityl ED-EPR spectrum (green) and excitation profile of rectangular observe echo sequence (blue) and pump (red) pulse for set-up 1. The expected modulation depth is 28%.

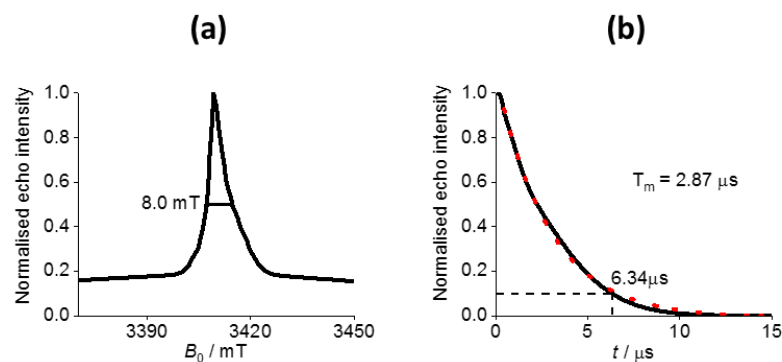

**Figure S17.** (a) ED-EPR spectrum and (b) two pulse echo decay trace of ubiquitin-Gd(III). The value at which the echo decays to 10% of its initial value and the  $T_m$  of the trityl spins after fitting a mono-exponential decay function (red dotted lines) are given on (b).

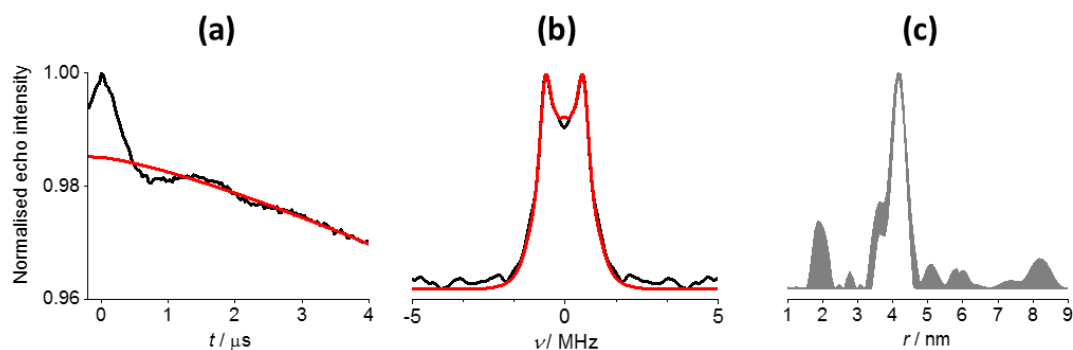

**Figure S18.** Ubiquitin-Gd(III) measured with rectangular DEER. (a) Primary DEER data with the red line indicating the background decay function, (b) frequency spectrum with the red line indicating the fit to the data and (c) validated distance distribution. The measurement was run 7.4 hrs.

## 6. Additional EPR data on ubiquitin-CT02MA/BrPy-DO3MA-Gd(III)

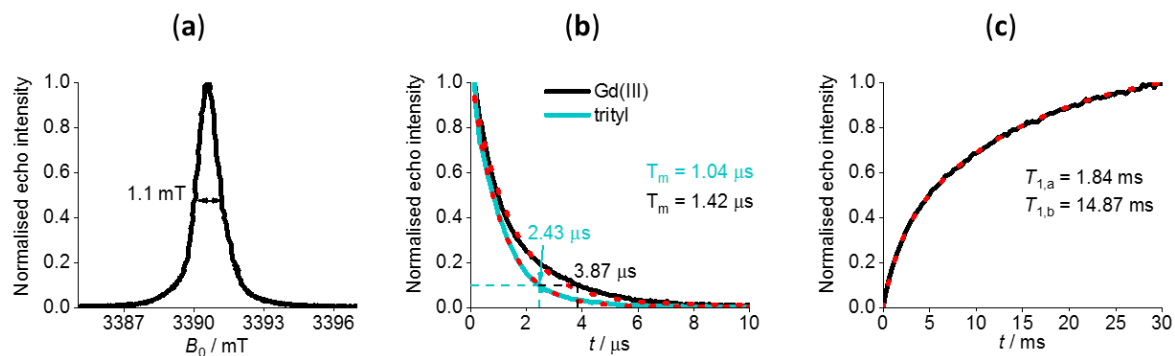

**Figure S19.** (a) ED-EPR spectrum of the trityl spins only (optimized for the trityl), (b) two pulse echo decay traces and (c) saturation recovery measurement measured at the maxima of the trityl and Gd(III) spectra at 10 K (a, b) and at 20 K (c). A fast and a slow component of longitudinal relaxation  $T_1$  after fitting a bi-exponential fit function (red dotted line) is given in (c) and the values at which the echo decays to 10% of its initial value and the  $T_m$  of the trityl and Gd(III) spins after fitting a mono-exponential decay function (red dotted lines) are given in (b).



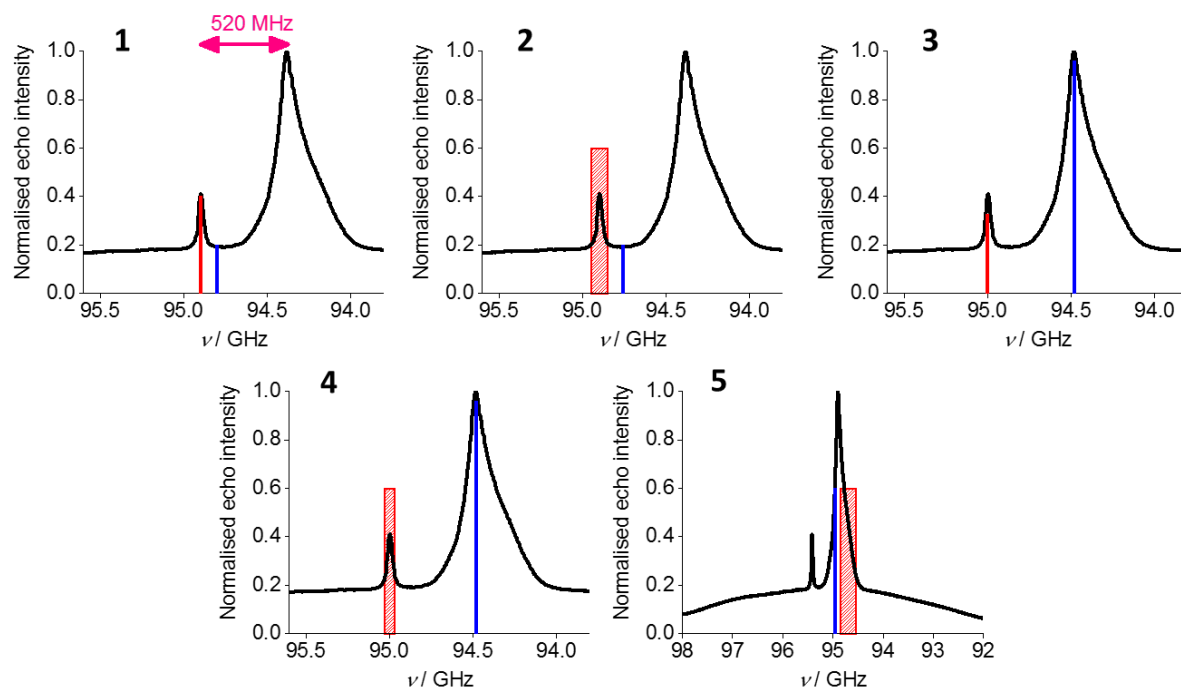

**Figure S20.** The different DEER experimental set-ups using rectangular (set-ups **1**, **3**) and chirp (set-ups **2**, **4**, **5**) pump pulse(s) on ubiquitin-trityl/Gd(III), with the experimental set-up details given in Table S5. Set-up **5** is designed for Gd(III)-Gd(III) distance measurements while all the others for Gd(III)-trityl distance measurements. The red lines denote the pumped spins and the blue lines denote the observed spins.

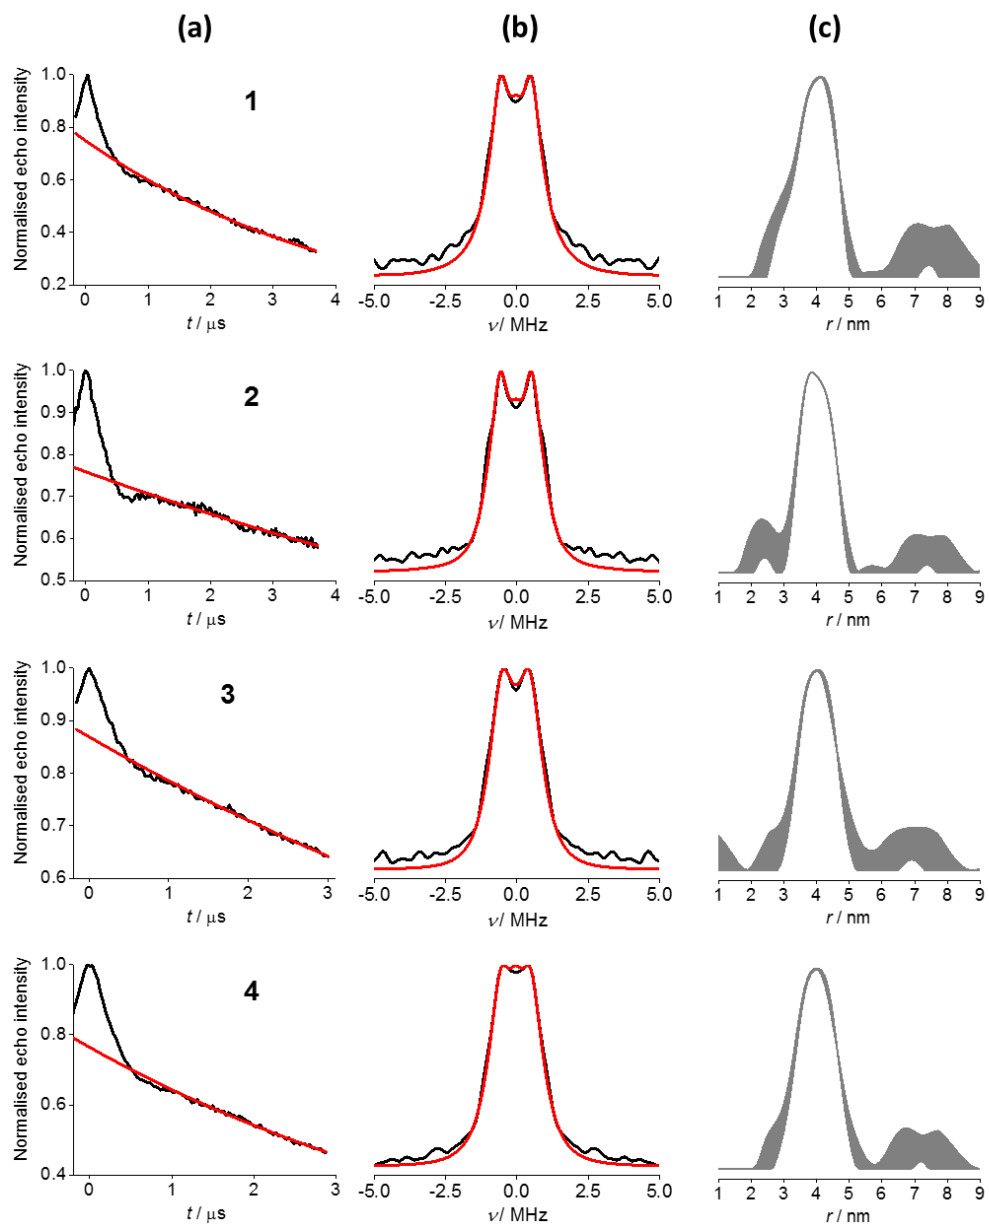

**Figure S21.** DEER results on ubiquitin-trityl/Gd(III) using the single or dual mode cavity (the set-up is given in parenthesis). (a) Primary DEER data with the red line indicating the background decay function, (b) respective frequency spectra with the red line indicating the fit to the data after Tikhonov regularization and (c) validated distance distributions.

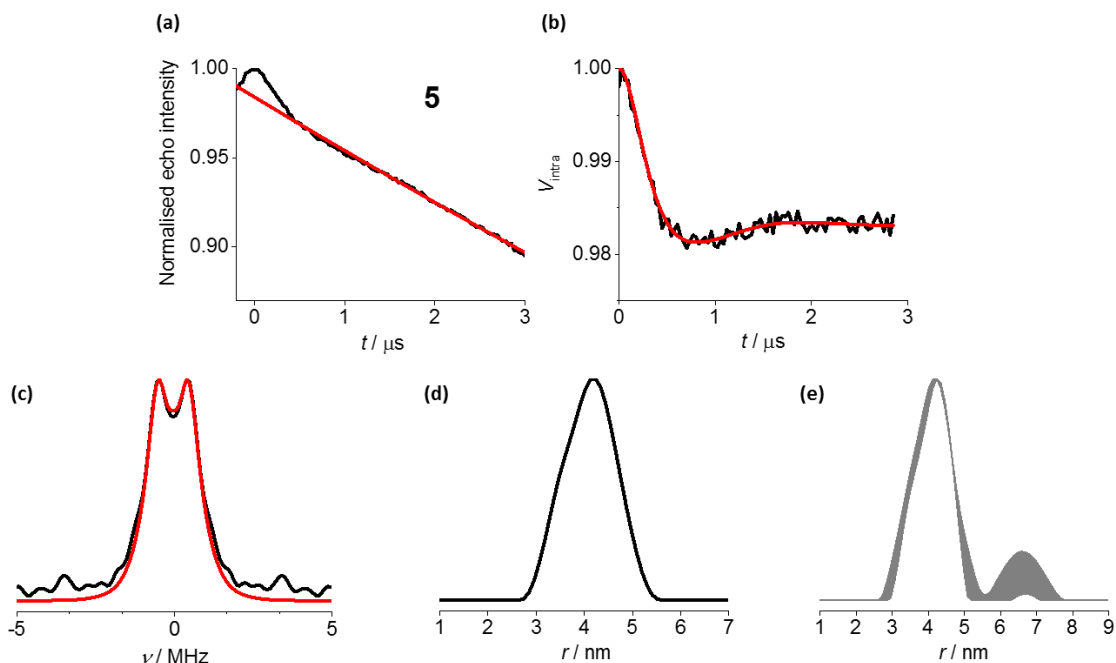

**Figure S22.** Ubiquitin-trityl/Gd(III) measured with chirp DEER with the single mode cavity (set-up **5**, in Figure S20) to observe Gd(III)-Gd(III) distances. (a) Primary DEER data with the red line indicating the background decay function, (b) background corrected DEER data with the red line indicating the fit to the data and (c) frequency spectrum with the red line indicating the fit to the data, (d) corresponding distance distribution and (e) validated distance distribution. The experimental set-up details given in Table S5. The measurement was run 3.9 hrs.

## References

1. M. Pannier, S. Veit, A. Godt, G. Jeschke and H. W. Spiess, *J. Magn. Reson.*, 2000, **142**, 331-340.
2. R. G. Larsen and D. J. Singel, *J. Chem. Phys.*, 1993, **98**, 5134-5146.
3. A. D. Milov, K. M. Salikhov and M. D. Shirov, *Fiz. Tverd. Tela*, 1981, **23**, 975-982.
4. P. P. Borbat and J. H. Freed, *Chem. Phys. Lett.*, 1999, **313**, 145-154.
5. G. Y. Shevelev, O. A. Krumkacheva, A. A. Lomzov, A. A. Kuzhelev, O. Y. Rogozhnikova, D. V. Trukhin, T. I. Troitskaya, V. M. Tormyshev, M. V. Fedin, D. V. Pyshnyi and E. G. Bagryanskaya, *J. Am. Chem. Soc.*, 2014, **136**, 9874-9877.
